# Supplementary material
Source: publisher figshare collection journal article supplement (https://springernature.figshare.com/ndownloader/files/18742289)
Supplement: Supplementary file 1 [file 18742289]

**Additional file 2** Effect of application of bio-products one week after inoculation with *F. proliferatum* on the disease severity of fusarium root rot of Ba kich

| **Treatment** | **Disease severity (%)** | | |
| --- | --- | --- | --- |
| **BKVN** | **BKDT** | **BKPL** |
| Actino Vate | 52.22c | 47.40cd | 51.11cd |
| Bionite | 49.63c | 53.33bc | 50.00cd |
| Ketomium | 61.85b | 58.51b | 65.55b |
| BIMA | 52.96c | 57.03b | 55.18c |
| TRICHO | 51.85c | 52.59bc | 55.55c |
| SH-BV1 | 49.63c | 45.56d | 44.81d |
| MICROTECH-1(NL) | 47.77c | 43.70d | 46.66d |
| Inoculated, untreated control | 81.11a | 80.37a | 82.59a |
| Uninoculated control | 0.00d | 0.00e | 0.00e |
| P | <0.05 | <0.05 | <0.05 |

Note: Different letters indicate significant difference by LSD0.05.
